# Supplementary material for: Barium bioaccumulation by bacterial biofilms and implications for Ba cycling and use of Ba proxies
Source: PubMed Central journal article supplement (PMC5915594; doi:10.1038/s41467-018-04069-z), 2018-04-24
Supplement: 41467_2018_4069_MOESM1_ESM.pdf [file 41467_2018_4069_MOESM1_ESM.pdf]

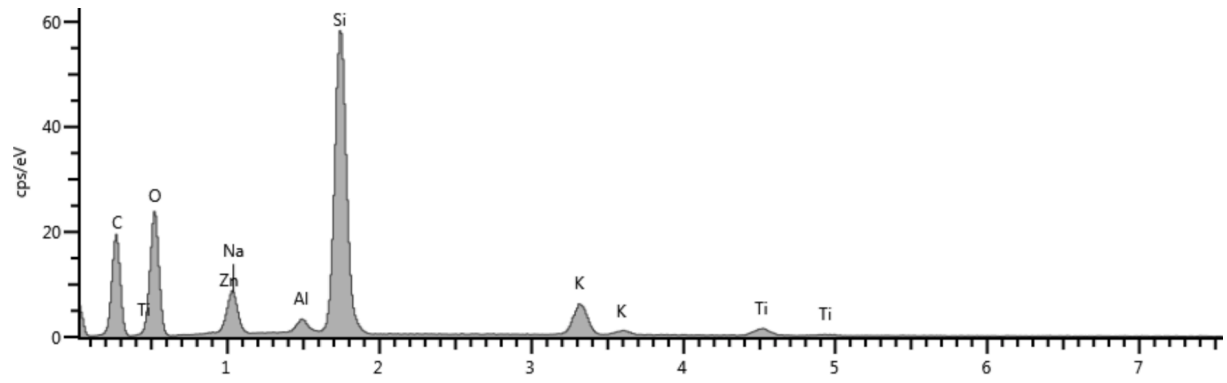

**Supplementary Fig. 1.** SEM-EDX spectrum showing the composition of the glass coverslips used for the experiments.

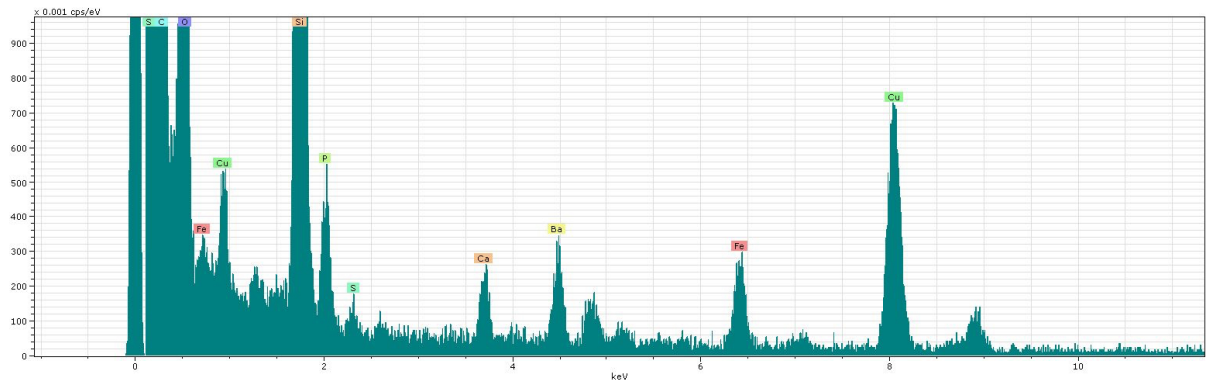

**Supplementary Fig. 2.** TEM-EDX spectrum showing the composition of the Ba precipitates (Fig. 4b).

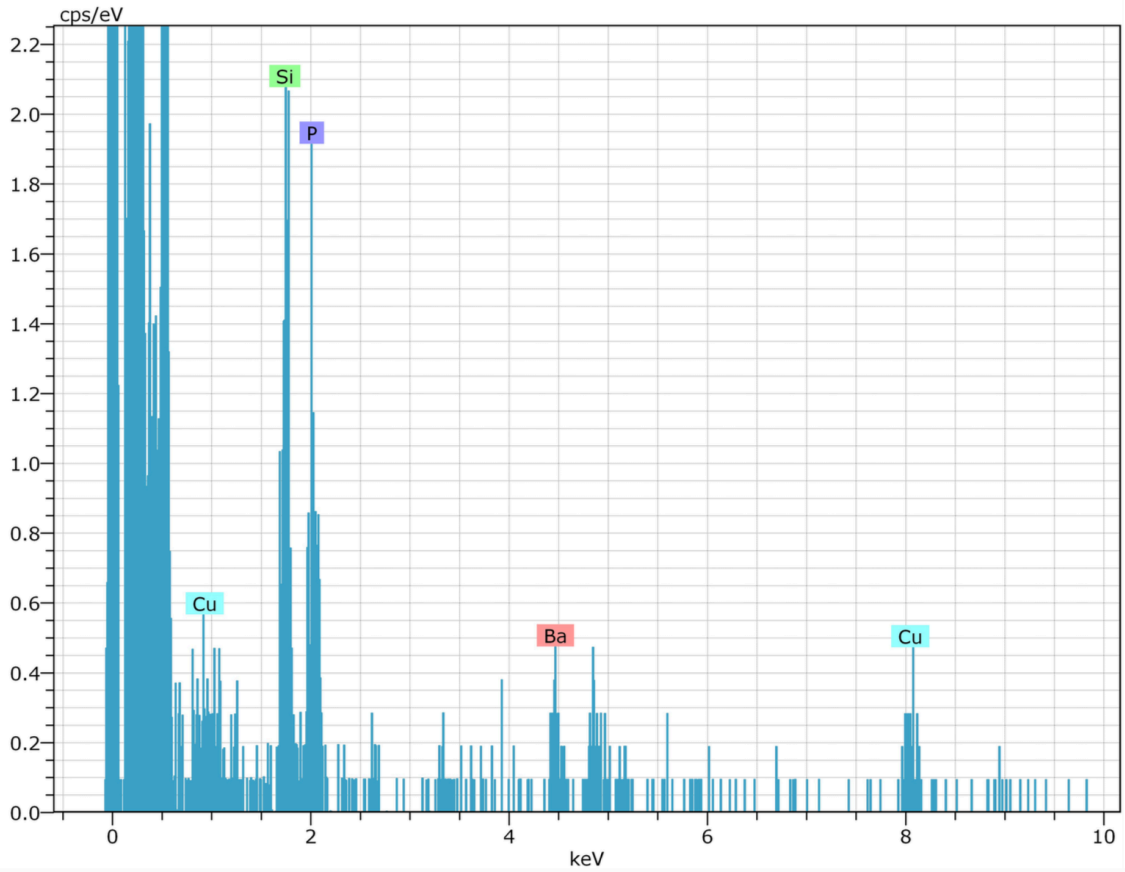

1.spx Date:6/29/2015 12:41:38 PM HV:300.0kV Puls th.:2.63kcps

**Supplementary Fig. 3.** TEM-EDX spectrum showing the composition of a likely polyphosphate grain in bacterial cells (Fig. 3c).

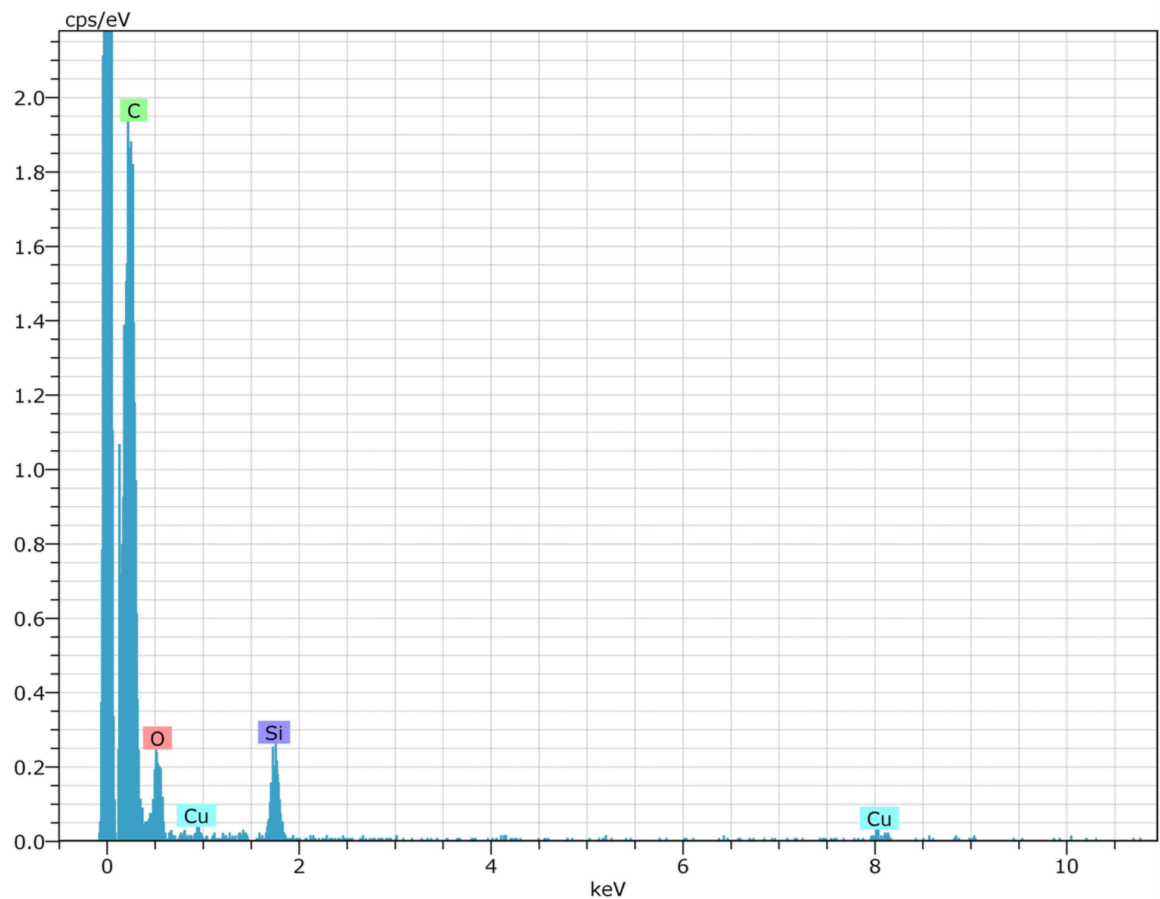

1 Date:5/29/2015 1:50:07 PM HV:300.0kV Puls th.:1.09kcps

**Supplementary Fig. 4.** Spectrum showing the background composition in TEM-EDX spectra.
